# Supplementary material
Source: Springer Nature journal article supplement (https://www.springermedizin.de/resource/supplementary/12916_2012_718_MOESM7_ESM.pdf/9598740)

**a** i.v. injections in C57 mouse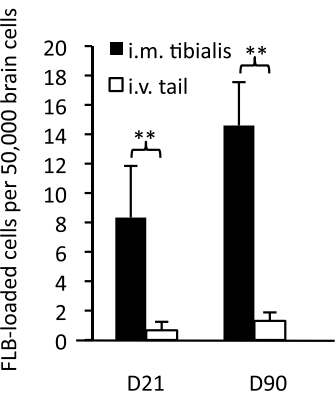**b** DLN ablation in C57 mouse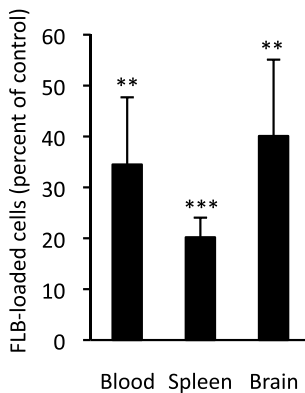**c**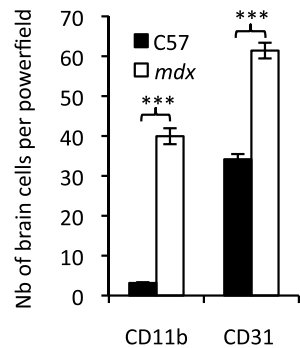**d** FLBs in mdx brain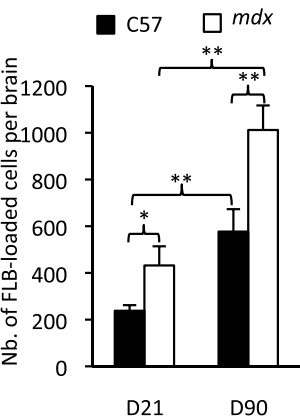**e**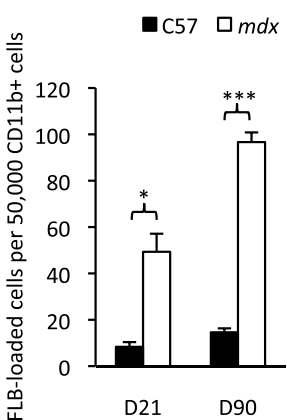**f**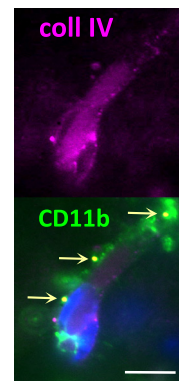

Supplement: MOESM7 [file 9598740]
